# Supplementary material for: Predictors of COVID-19-Related Perceived Improvements in Dietary Health: Results from a US Cross-Sectional Study
Source: MDPI journal article supplement (doi:10.3390/nu13062097), 2021-06-19
Supplement: s1 [file s1]

**Supplementary Table 1.** Binary logistic regression analysis of perceived increase in dietary healthfulness among males (n=491).

| Independent variable                                            | B           | S.E.        | Wald        | P-value      | OR (95% CI)             |
|-----------------------------------------------------------------|-------------|-------------|-------------|--------------|-------------------------|
| Household income (2019)                                         | 0.06        | 0.07        | 0.71        | 0.399        | 1.06 (0.93-1.12)        |
| <b>Change in frequency meals with family in front of the TV</b> | <b>0.05</b> | <b>0.09</b> | <b>0.27</b> | <b>0.601</b> | <b>1.05 (0.88-1.24)</b> |
| COVID-19 income loss                                            | 0.48        | 0.22        | 4.86        | 0.028        | 1.61 (1.05-2.47)*       |
| Shift to telecommuting                                          | -0.14       | 0.13        | 1.08        | 0.298        | 0.87 (0.67-1.13)        |
| Change in food ad exposure                                      | 0.40        | 0.10        | 14.80       | <0.001       | 1.49 (1.22-1.83)*       |
| <b>Perceived Stress Scale score</b>                             | <b>0.03</b> | <b>0.02</b> | <b>3.84</b> | <b>0.05</b>  | <b>1.03 (1.00-1.07)</b> |
| Perceived current health                                        | 0.41        | 0.12        | 11.33       | <0.001       | 1.51 (1.19-1.91)*       |
| Model $\chi^2= 66.602$ P<0.001                                  |             |             |             |              |                         |
| Hosmer and Lemeshow $\chi^2=11.485$ P=0.176                     |             |             |             |              |                         |
| Pseudo R <sup>2</sup> = 0.169                                   |             |             |             |              |                         |
| n= 491                                                          |             |             |             |              |                         |

\*indicates statistical significance at the p<0.05 level

Statistical conclusions between the regressions in the total study sample and the subgroup (shown above) differ for the variables in bold font

**Supplementary Table 2.** Binary logistic regression analysis of perceived increase in dietary healthfulness among females (n=467).

| Independent variable                                            | B           | S.E.        | Wald        | P-value      | OR (95% CI)              |
|-----------------------------------------------------------------|-------------|-------------|-------------|--------------|--------------------------|
| Household income (2019)                                         | 0.01        | 0.06        | 0.01        | 0.920        | 1.00 (0.89-1.14)         |
| <b>Change in frequency meals with family in front of the TV</b> | <b>0.30</b> | <b>0.10</b> | <b>9.38</b> | <b>0.002</b> | <b>1.35 (1.11-1.63)*</b> |
| COVID-19 income loss                                            | 0.52        | 0.21        | 6.01        | 0.014        | 1.68 (1.11-2.55)*        |
| Shift to telecommuting                                          | -0.05       | 0.13        | 1.34        | 0.715        | 0.95 (0.73-1.24)         |
| Change in food ad exposure                                      | 0.44        | 0.10        | 20.94       | <0.001       | 1.56 (1.29-1.88)*        |
| Perceived Stress Scale score                                    | 0.05        | 0.02        | 9.09        | 0.003        | 1.05 (1.02-1.08)*        |
| Perceived current health                                        | 0.45        | 0.12        | 13.37       | <0.001       | 1.56 (1.23-1.98)*        |
| Model $\chi^2= 81.986$ P<0.001                                  |             |             |             |              |                          |
| Hosmer and Lemeshow $\chi^2=12.879$ P=0.116                     |             |             |             |              |                          |
| Pseudo R <sup>2</sup> = 0.216                                   |             |             |             |              |                          |
| n= 467                                                          |             |             |             |              |                          |

\*indicates statistical significance at the p<0.05 level

Statistical conclusions between the regressions in the total study sample and the subgroup (shown above) differ for the variables in bold font

**Supplementary Table 3.** Binary logistic regression analysis of perceived increase in dietary healthfulness among individuals aged 18-29 years (n=205).

| Independent variable    | B     | S.E. | Wald | P-value | OR (95% CI)      |
|-------------------------|-------|------|------|---------|------------------|
| Sex                     | -0.31 | 0.32 | 0.99 | 0.320   | 0.73 (0.40-1.36) |
| Household income (2019) | 0.09  | 0.10 | 0.82 | 0.365   | 1.09 (0.90-1.32) |

|                                                          |             |             |             |              |                         |
|----------------------------------------------------------|-------------|-------------|-------------|--------------|-------------------------|
| Change in frequency meals with family in front of the TV | 0.39        | 0.14        | 8.24        | 0.004        | 1.48 (1.13-1.94)*       |
| COVID-19 income loss                                     | 0.77        | 0.33        | 5.37        | 0.020        | 2.16 (1.13-4.13)*       |
| Shift to telecommuting                                   | -0.09       | 0.21        | 0.17        | 0.681        | 0.92 (0.61-1.39)        |
| <b>Change in food ad exposure</b>                        | <b>0.14</b> | <b>0.17</b> | <b>0.64</b> | <b>0.424</b> | <b>1.15 (0.82-1.61)</b> |
| <b>Perceived Stress Scale score</b>                      | <b>0.04</b> | <b>0.03</b> | <b>1.53</b> | <b>0.216</b> | <b>1.04 (0.98-1.11)</b> |
| Perceived current health                                 | 0.44        | 0.19        | 5.30        | 0.021        | 1.55 (1.07-2.25)*       |
| Model $\chi^2 = 32.488$ P < 0.001                        |             |             |             |              |                         |
| Hosmer and Lemeshow $\chi^2 = 4.767$ P = 0.782           |             |             |             |              |                         |
| Pseudo R <sup>2</sup> = 0.195                            |             |             |             |              |                         |
| n = 205                                                  |             |             |             |              |                         |

\*indicates statistical significance at the p < 0.05 level

Statistical conclusions between the regressions in the total study sample and the subgroup (shown above) differ for the variables in bold font

**Supplementary Table 4.** Binary logistic regression analysis of perceived increase in dietary healthfulness among individuals aged 30-39 years (n = 331).

| Independent variable                                            | B           | S.E.        | Wald        | P-value      | OR (95% CI)             |
|-----------------------------------------------------------------|-------------|-------------|-------------|--------------|-------------------------|
| Sex                                                             | 0.06        | 0.24        | 0.07        | 0.793        | 1.07 (0.66-1.71)        |
| Household income (2019)                                         | -0.03       | 0.08        | 0.13        | 0.718        | 0.97 (0.84-1.13)        |
| <b>Change in frequency meals with family in front of the TV</b> | <b>0.08</b> | <b>0.10</b> | <b>0.70</b> | <b>0.402</b> | <b>1.09 (0.89-1.32)</b> |
| <b>COVID-19 income loss</b>                                     | <b>0.24</b> | <b>0.25</b> | <b>0.94</b> | <b>0.332</b> | <b>1.27 (0.78-2.07)</b> |
| Shift to telecommuting                                          | -0.09       | 0.17        | 0.27        | 0.603        | 0.92 (0.66-1.27)        |
| Change in food ad exposure                                      | 0.32        | 0.12        | 7.68        | 0.006        | 1.38 (1.10-1.72)*       |
| <b>Perceived Stress Scale score</b>                             | <b>0.04</b> | <b>0.02</b> | <b>3.23</b> | <b>0.072</b> | <b>1.04 (1.00-1.08)</b> |
| Perceived current health                                        | 0.51        | 0.15        | 11.40       | <0.001       | 1.66 (1.24-2.22)*       |
| Model $\chi^2 = 36.011$ P < 0.001                               |             |             |             |              |                         |
| Hosmer and Lemeshow $\chi^2 = 5.046$ P = 0.753                  |             |             |             |              |                         |
| Pseudo R <sup>2</sup> = 0.138                                   |             |             |             |              |                         |
| n = 331                                                         |             |             |             |              |                         |

\*indicates statistical significance at the p < 0.05 level

Statistical conclusions between the regressions in the total study sample and the subgroup (shown above) differ for the variables in bold font

**Supplementary Table 5.** Binary logistic regression analysis of perceived increase in dietary healthfulness among individuals aged 40-49 years (n = 200).

| Independent variable                                            | B           | S.E.        | Wald        | P-value      | OR (95% CI)             |
|-----------------------------------------------------------------|-------------|-------------|-------------|--------------|-------------------------|
| Sex                                                             | -0.12       | 0.33        | 0.13        | 0.714        | 0.89 (0.47-1.68)        |
| Household income (2019)                                         | 0.02        | 0.10        | 0.03        | 0.856        | 1.02 (0.84-1.24)        |
| <b>Change in frequency meals with family in front of the TV</b> | <b>0.13</b> | <b>0.16</b> | <b>0.65</b> | <b>0.422</b> | <b>1.13 (0.84-1.54)</b> |
| <b>COVID-19 income loss</b>                                     | <b>0.34</b> | <b>0.34</b> | <b>0.96</b> | <b>0.327</b> | <b>1.40 (0.71-2.75)</b> |

|                                                 |      |      |       |        |                   |
|-------------------------------------------------|------|------|-------|--------|-------------------|
| Shift to telecommuting                          | 0.01 | 0.20 | 0.01  | 0.944  | 1.01 (0.68-1.51)  |
| Change in food ad exposure                      | 0.70 | 0.16 | 18.92 | <0.001 | 2.00 (1.47-2.76)* |
| Perceived Stress Scale score                    | 0.05 | 0.03 | 3.86  | 0.049  | 1.05 (1.00-1.11)* |
| Perceived current health                        | 0.53 | 0.19 | 7.58  | 0.006  | 1.70 (1.17-2.48)* |
| Model $\chi^2 = 46.165$ P < 0.001               |      |      |       |        |                   |
| Hosmer and Lemeshow $\chi^2 = 15.105$ P = 0.057 |      |      |       |        |                   |
| Pseudo R <sup>2</sup> = 0.275                   |      |      |       |        |                   |
| n = 200                                         |      |      |       |        |                   |

\*indicates statistical significance at the p < 0.05 level

Statistical conclusions between the regressions in the total study sample and the subgroup (shown above) differ for the variables in bold font

**Supplementary Table 6.** Binary logistic regression analysis of perceived increase in dietary healthfulness among individuals aged 50-59 years (n=120).

| Independent variable                                            | B           | S.E.        | Wald        | P-value      | OR (95% CI)             |
|-----------------------------------------------------------------|-------------|-------------|-------------|--------------|-------------------------|
| Sex                                                             | -0.74       | 0.45        | 2.69        | 0.101        | 0.48 (0.20-1.15)        |
| Household income (2019)                                         | 0.12        | 0.12        | 0.94        | 0.332        | 1.13 (0.89-1.43)        |
| <b>Change in frequency meals with family in front of the TV</b> | <b>0.23</b> | <b>0.23</b> | <b>1.02</b> | <b>0.313</b> | <b>1.26 (0.80-2.00)</b> |
| <b>COVID-19 income loss</b>                                     | <b>0.84</b> | <b>0.47</b> | <b>3.27</b> | <b>0.070</b> | <b>2.33 (0.93-5.80)</b> |
| Shift to telecommuting                                          | -0.07       | 0.29        | 0.05        | 0.822        | 0.94 (0.53-1.66)        |
| Change in food ad exposure                                      | 0.54        | 0.19        | 7.77        | 0.005        | 1.72 (1.17-2.51)*       |
| <b>Perceived Stress Scale score</b>                             | <b>0.06</b> | <b>0.04</b> | <b>3.01</b> | <b>0.083</b> | <b>1.06 (0.99-1.14)</b> |
| <b>Perceived current health</b>                                 | <b>0.40</b> | <b>0.28</b> | <b>2.15</b> | <b>0.142</b> | <b>1.50 (0.87-2.57)</b> |
| Model $\chi^2 = 36.283$ P < 0.001                               |             |             |             |              |                         |
| Hosmer and Lemeshow $\chi^2 = 7.728$ P = 0.460                  |             |             |             |              |                         |
| Pseudo R <sup>2</sup> = 0.349                                   |             |             |             |              |                         |
| n = 120                                                         |             |             |             |              |                         |

\*indicates statistical significance at the p < 0.05 level

Statistical conclusions between the regressions in the total study sample and the subgroup (shown above) differ for the variables in bold font

**Supplementary Table 7.** Binary logistic regression analysis of perceived increase in dietary healthfulness among individuals aged 60+ years (n=102).

| Independent variable                                            | B            | S.E.        | Wald        | P-value      | OR (95% CI)             |
|-----------------------------------------------------------------|--------------|-------------|-------------|--------------|-------------------------|
| Sex                                                             | -0.18        | 0.50        | 0.14        | 0.713        | 0.83 (0.31-2.21)        |
| Household income (2019)                                         | -0.21        | 0.17        | 1.59        | 0.208        | 0.81 (0.58-1.13)        |
| <b>Change in frequency meals with family in front of the TV</b> | <b>-0.09</b> | <b>0.24</b> | <b>0.14</b> | <b>0.705</b> | <b>0.91 (0.57-1.47)</b> |

|                                                |              |             |             |              |                         |
|------------------------------------------------|--------------|-------------|-------------|--------------|-------------------------|
| COVID-19 income loss                           | 1.28         | 0.54        | 5.68        | 0.017        | 3.60 (1.26-10.30)*      |
| Shift to telecommuting                         | -0.41        | 0.31        | 1.80        | 0.180        | 0.66 (0.36-1.21)        |
| Change in food ad exposure                     | 0.58         | 0.25        | 5.30        | 0.021        | 1.78 (1.09-2.90)*       |
| <b>Perceived Stress Scale score</b>            | <b>0.00</b>  | <b>0.04</b> | <b>0.01</b> | <b>0.938</b> | <b>1.00 (0.93-1.08)</b> |
| <b>Perceived current health</b>                | <b>-0.04</b> | <b>0.27</b> | <b>0.02</b> | <b>0.876</b> | <b>0.96 (0.57-1.63)</b> |
| Model $\chi^2 = 22.493$ P = 0.004              |              |             |             |              |                         |
| Hosmer and Lemeshow $\chi^2 = 6.509$ P = 0.590 |              |             |             |              |                         |
| Pseudo R <sup>2</sup> = 0.275                  |              |             |             |              |                         |
| n = 102                                        |              |             |             |              |                         |

\*indicates statistical significance at the p<0.05 level

Statistical conclusions between the regressions in the total study sample and the subgroup (shown above) differ for the variables in bold font
