# Supplementary material for: Predictors of COVID-19-Related Perceived Improvements in Dietary Health: Results from a US Cross-Sectional Study
Source: MDPI journal article supplement (doi:10.3390/nu13062097), 2021-06-19
Supplement: s1 [file s1]

# COVID-19 Household food behaviors

---

Do you speak/read/write the English language?

☐ Yes

☐ No

---

Are you 18 years of age or older?

☐ Yes

☐ No

---

Do you currently reside in the United States?

☐ Yes

☐ No

---

Do you consider yourself the primary food purchaser in your home (the individual who does most of the grocery shopping)?

☐ Yes

☐ No

---

*Display This Question:*

*If Do you speak/read/write the English language? = No*

*Or Are you 18 years of age or older? = No*

*Or Do you currently reside in the United States? = No*

*Or Do you consider yourself the primary food purchaser in your home (the individual who does most of... = No*

Unfortunately, you are not eligible to participate in our study. No completion code will be provided.

*Display This Question:*

*If Do you speak/read/write the English language? = Yes*

*And Are you 18 years of age or older? = Yes*

*And Do you currently reside in the United States? = Yes*

*And Do you consider yourself the primary food purchaser in your home (the individual who does most of... = Yes*

You are eligible to participate in our study!

Welcome to the COVID-19 and Household Health Behaviors survey. Please take your time to read the questions and choose the answer that best describes your household.

Please start by telling us a little bit about yourself and the people in your household.

---

How old are you? Please enter a number.

---

---

What is your sex?

☐ Male

☐ Female

---

Are you of Hispanic, Latino, or Spanish origin?

☐ Yes

☐ No

---

What is your race? Please select all that apply.

☐

White

☐

Black or African American

☐

American Indian or Alaska Native

☐

Asian

☐

Native Hawaiian or Pacific Islander

☐

Other

---

What is the highest degree or level of school you have completed?

- ☐ Less than high school
  - ☐ Some high school
  - ☐ High school graduate or equivalent
  - ☐ Some college but degree not received or is in progress
  - ☐ Associate's degree
  - ☐ Bachelor's degree
  - ☐ Graduate degree
- 

What is your marital status?

- ☐ Now married
  - ☐ Widowed
  - ☐ Divorced
  - ☐ Separated
  - ☐ Never married
-

How many total people – adults and children – currently live in your household, including yourself? Please enter a number.

---

How many people under 18 years old currently live in your household? Please enter a number.

---

In 2019 what was your **total household income** before taxes?

- ☐ Less than \$25,000
- ☐ \$25,000 - \$34,999
- ☐ \$35,000 - \$49,999
- ☐ \$50,000 - \$74,999
- ☐ \$75,000 - \$99,999
- ☐ \$100,000 - \$149,999
- ☐ \$150,000 - \$199,999
- ☐ \$200,000 and above

Have you or anyone in your household experienced a loss of employment income due to the COVID-19 pandemic?

- ☐ Yes
- ☐ No

Are all of the adults in your household employed?

☐ Yes

☐ No

---

*Display This Question:*

*If Are all of the adults in your household employed? = No*

What are the main reasons for the adult(s) in your household being unemployed?

- ☐ Do not want to be employed at this time
  - ☐ Sick with coronavirus symptoms
  - ☐ Caring for someone with coronavirus symptoms
  - ☐ Caring for children not in school or daycare
  - ☐ Caring for an elderly person
  - ☐ Concerned about getting or spreading the coronavirus
  - ☐ Sick (not coronavirus related) or disabled
  - ☐ Retired
  - ☐ Employer experienced a reduction in business (including furlough) due to coronavirus pandemic
  - ☐ Laid off due to coronavirus pandemic
  - ☐ Employer closed temporarily due to the coronavirus pandemic
  - ☐ Employer went out of business due to the coronavirus pandemic
  - ☐ Other reason, please specify
-

Working from home is sometimes referred to as telework. Did any adults in your household, including yourself, substitute some or all of their typical in-person work for telework because of the COVID-19 pandemic?

- ☐ Yes, at least one adult substituted **all** of their typical in-person work for telework
- ☐ Yes, at least one adult substituted **some** of their typical in-person work for telework
- ☐ No, no adults substituted their typical in-person work for telework

*Display This Question:*

*If If How many people under 18 years old currently live in your household? Please enter a number. Text Response Is Greater Than 0*

Are any adults in your household responsible for caring for children who are staying at home **because of the COVID-19 pandemic**?

- ☐ Yes
- ☐ No

Now we are going to ask about the food situation in your household.

Please indicate whether the following statements were true **before the COVID-19 pandemic**.

|                                                                              | Declined to answer    | Never true            | Sometimes true        | Often true            |
|------------------------------------------------------------------------------|-----------------------|-----------------------|-----------------------|-----------------------|
| I worried whether our food would run out before I got money to buy more      | <input type="radio"/> | <input type="radio"/> | <input type="radio"/> | <input type="radio"/> |
| The food that I bought just didn't last, and I didn't have money to get more | <input type="radio"/> | <input type="radio"/> | <input type="radio"/> | <input type="radio"/> |
| I couldn't afford to eat balanced meals                                      | <input type="radio"/> | <input type="radio"/> | <input type="radio"/> | <input type="radio"/> |



Please indicate whether the following statements have been true **during the COVID-19 pandemic**.

|                                                                              | Declined to answer    | Never true            | Sometimes true        | Often true            |
|------------------------------------------------------------------------------|-----------------------|-----------------------|-----------------------|-----------------------|
| I worried whether our food would run out before I got money to buy more      | <input type="radio"/> | <input type="radio"/> | <input type="radio"/> | <input type="radio"/> |
| The food that I bought just didn't last, and I didn't have money to get more | <input type="radio"/> | <input type="radio"/> | <input type="radio"/> | <input type="radio"/> |
| I couldn't afford to eat balanced meals                                      | <input type="radio"/> | <input type="radio"/> | <input type="radio"/> | <input type="radio"/> |

Because of the COVID-19 pandemic, did you stock up on nonperishable food?

NOTE: nonperishable food includes shelf-stable foods that do not require refrigeration

☐ Yes

☐ No

*Display This Question:*

*If Because of the COVID-19 pandemic, did you stock up on nonperishable food? NOTE: nonperishable foo... = Yes*

When you stocked up on nonperishable food, how much extra food did you purchase compared to the amount you normally buy?

- ☐ Much more
- ☐ Moderately more
- ☐ Slightly more

---

*Display This Question:*

*If Because of the COVID-19 pandemic, did you stock up on nonperishable food? NOTE: nonperishable foo... = Yes*

Of the nonperishable food you purchased when stocking up, how much **has been** consumed by someone in your household?

- ☐ All
- ☐ Most
- ☐ Some
- ☐ Very little
- ☐ None

---

*Display This Question:*

*If Because of the COVID-19 pandemic, did you stock up on nonperishable food? NOTE: nonperishable foo... = Yes*

Of the nonperishable food you purchased when stocking up, how much do you think **will eventually be** consumed by someone in your household?

- ☐ All
  - ☐ Most
  - ☐ Some
  - ☐ Very little
  - ☐ None
- 

**Before the COVID-19 pandemic**, where did you obtain most of the food for household consumption? Check all that apply.

- ☐ Grocery store
- ☐ Farmer's market
- ☐ Convenience store
- ☐ Online grocery shopping
- ☐ Takeout (pick up or home delivery)
- ☐ Sit-down restaurant
- ☐ Fast food restaurant
- ☐ Meal kit service (Blue Apron, Hello Fresh, etc.)
- ☐ Home garden
- ☐ Other \_\_\_\_\_

---

**During the COVID-19 pandemic**, where have you obtained most of the food for household consumption? Check all that apply.

- ☐ Grocery store
  - ☐ Farmer's market
  - ☐ Convenience store
  - ☐ Online grocery shopping
  - ☐ Takeout (pick up or home delivery)
  - ☐ Sit-down restaurant
  - ☐ Fast food restaurant
  - ☐ Meal kit service (Blue Apron, Hello Fresh, etc.)
  - ☐ Home garden
  - ☐ Other \_\_\_\_\_
-

**Before the COVID-19 pandemic**, how often did you or someone in your household eat something from a fast food restaurant (McDonald's, Burger King, etc.) in a typical week?

- ☐ Never
  - ☐ 1-2 times
  - ☐ 3-4 times
  - ☐ 5-6 times
  - ☐ 7 times
  - ☐ More than 7 times
- 

**During the COVID-19 pandemic**, how often have you or someone in your household eaten something from a fast food restaurant (McDonald's, Burger King, etc.) in a typical week?

- ☐ Never
  - ☐ 1-2 times
  - ☐ 3-4 times
  - ☐ 5-6 times
  - ☐ 7 times
  - ☐ More than 7 times
-

**Before the COVID-19 pandemic**, what percentage of meals consumed in your household were prepared at home?

0 10 20 30 40 50 60 70 80 90 100

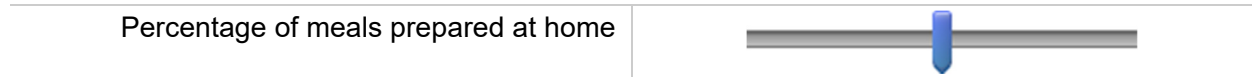

**During the COVID-19 pandemic**, what percentage of meals consumed in your household have been prepared at home?

0 10 20 30 40 50 60 70 80 90 100

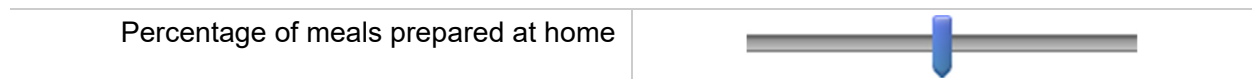

Compared to your habits prior to the COVID-19 pandemic, how have your grocery shopping behaviors changed during the pandemic?

|                                                            | Buy<br>significantly<br>less | Buy<br>somewhat<br>less | No change             | Buy<br>somewhat<br>more | Buy<br>significantly<br>more |
|------------------------------------------------------------|------------------------------|-------------------------|-----------------------|-------------------------|------------------------------|
| Fresh fruit                                                | <input type="radio"/>        | <input type="radio"/>   | <input type="radio"/> | <input type="radio"/>   | <input type="radio"/>        |
| Fresh<br>vegetables                                        | <input type="radio"/>        | <input type="radio"/>   | <input type="radio"/> | <input type="radio"/>   | <input type="radio"/>        |
| Dairy products                                             | <input type="radio"/>        | <input type="radio"/>   | <input type="radio"/> | <input type="radio"/>   | <input type="radio"/>        |
| Meat/poultry                                               | <input type="radio"/>        | <input type="radio"/>   | <input type="radio"/> | <input type="radio"/>   | <input type="radio"/>        |
| Eggs                                                       | <input type="radio"/>        | <input type="radio"/>   | <input type="radio"/> | <input type="radio"/>   | <input type="radio"/>        |
| Meat<br>alternatives<br>(veggie<br>burgers, tofu,<br>etc.) | <input type="radio"/>        | <input type="radio"/>   | <input type="radio"/> | <input type="radio"/>   | <input type="radio"/>        |
| Seafood                                                    | <input type="radio"/>        | <input type="radio"/>   | <input type="radio"/> | <input type="radio"/>   | <input type="radio"/>        |
| Nuts and<br>seeds                                          | <input type="radio"/>        | <input type="radio"/>   | <input type="radio"/> | <input type="radio"/>   | <input type="radio"/>        |
| Grains/flour<br>and legumes                                | <input type="radio"/>        | <input type="radio"/>   | <input type="radio"/> | <input type="radio"/>   | <input type="radio"/>        |
| Bread/bread<br>products                                    | <input type="radio"/>        | <input type="radio"/>   | <input type="radio"/> | <input type="radio"/>   | <input type="radio"/>        |
| Nonperishable<br>foods                                     | <input type="radio"/>        | <input type="radio"/>   | <input type="radio"/> | <input type="radio"/>   | <input type="radio"/>        |
| Frozen foods                                               | <input type="radio"/>        | <input type="radio"/>   | <input type="radio"/> | <input type="radio"/>   | <input type="radio"/>        |

Compared to your habits prior to the COVID-19 pandemic, how have your food waste behaviors changed during the pandemic?

|                                                   | Waste<br>significantly<br>less | Waste<br>somewhat<br>less | No change             | Waste<br>somewhat<br>more | Waste<br>significantly<br>more |
|---------------------------------------------------|--------------------------------|---------------------------|-----------------------|---------------------------|--------------------------------|
| Fresh fruit                                       | <input type="radio"/>          | <input type="radio"/>     | <input type="radio"/> | <input type="radio"/>     | <input type="radio"/>          |
| Fresh vegetables                                  | <input type="radio"/>          | <input type="radio"/>     | <input type="radio"/> | <input type="radio"/>     | <input type="radio"/>          |
| Dairy products                                    | <input type="radio"/>          | <input type="radio"/>     | <input type="radio"/> | <input type="radio"/>     | <input type="radio"/>          |
| Meat/poultry                                      | <input type="radio"/>          | <input type="radio"/>     | <input type="radio"/> | <input type="radio"/>     | <input type="radio"/>          |
| Eggs                                              | <input type="radio"/>          | <input type="radio"/>     | <input type="radio"/> | <input type="radio"/>     | <input type="radio"/>          |
| Meat alternatives<br>(veggie burgers, tofu, etc.) | <input type="radio"/>          | <input type="radio"/>     | <input type="radio"/> | <input type="radio"/>     | <input type="radio"/>          |
| Seafood                                           | <input type="radio"/>          | <input type="radio"/>     | <input type="radio"/> | <input type="radio"/>     | <input type="radio"/>          |
| Nuts and seeds                                    | <input type="radio"/>          | <input type="radio"/>     | <input type="radio"/> | <input type="radio"/>     | <input type="radio"/>          |
| Grains/flour and legumes                          | <input type="radio"/>          | <input type="radio"/>     | <input type="radio"/> | <input type="radio"/>     | <input type="radio"/>          |
| Bread/bread products                              | <input type="radio"/>          | <input type="radio"/>     | <input type="radio"/> | <input type="radio"/>     | <input type="radio"/>          |
| Nonperishable foods                               | <input type="radio"/>          | <input type="radio"/>     | <input type="radio"/> | <input type="radio"/>     | <input type="radio"/>          |
| Frozen foods                                      | <input type="radio"/>          | <input type="radio"/>     | <input type="radio"/> | <input type="radio"/>     | <input type="radio"/>          |



**Before the COVID-19 pandemic**, in an average week, what percentage of food purchased at the **grocery store** would you usually throw away?

0 10 20 30 40 50 60 70 80 90 100

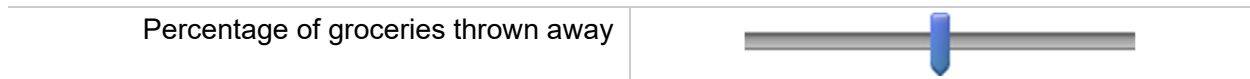

**During the COVID-19 pandemic**, in an average week, what percentage of food purchased at the **grocery store** do you usually throw away?

0 10 20 30 40 50 60 70 80 90 100

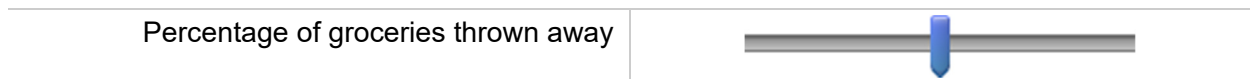

**Before the COVID-19 pandemic**, in an average week, what percentage of food purchased from a **restaurant** (including takeout) would usually get thrown away (for example, leftovers that don't get eaten or food that gets left on the plate at the restaurant)?

0 10 20 30 40 50 60 70 80 90 100

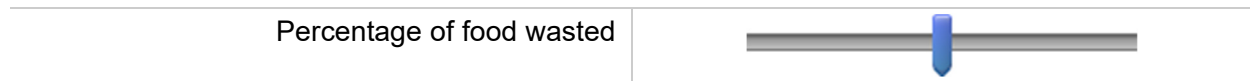

**During the COVID-19 pandemic**, in an average week, what percentage of food purchased from a **restaurant** (including takeout) usually gets thrown away (for example, leftovers that don't get eaten or food that gets left on the plate at the restaurant)?

0 10 20 30 40 50 60 70 80 90 100

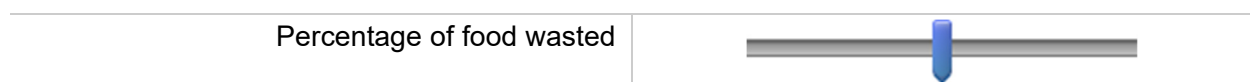

You are almost done with all questions. By clicking "Somewhat disagree" you confirm that you are still paying attention to this survey.

- ☐ Strongly agree
- ☐ Agree
- ☐ Somewhat agree
- ☐ Neither agree nor disagree
- ☐ Somewhat disagree
- ☐ Disagree
- ☐ Strongly disagree

*Display This Question:*

*If You are almost done with all questions. By clicking "Somewhat disagree" you confirm that you are... != Somewhat disagree*

Unfortunately, you did not pass our check question. No completion code will be provided.

*Skip To: End of Survey If Unfortunately, you did not pass our check question. No completion code will be provided. Is Displayed*

During the COVID-19 pandemic, have you or anyone in your household been exposed to more food advertisements than before the pandemic?

- ☐ Definitely yes
  - ☐ Probably yes
  - ☐ Might or might not
  - ☐ Probably not
  - ☐ Definitely not
- 

Did the eating habits of anyone in your household change because of the COVID-19 pandemic?

- ☐ Definitely yes
  - ☐ Probably yes
  - ☐ Might or might not
  - ☐ Probably not
  - ☐ Definitely not
-

*Display This Question:*

*If Did the eating habits of anyone in your household change because of the COVID-19 pandemic? != Definitely not*

*And Did the eating habits of anyone in your household change because of the COVID-19 pandemic? != Probably not*

How would you describe the impact of those changes on the healthfulness of eating habits in your household?

- ☐ Eating habits became much healthier
  - ☐ Eating habits became somewhat healthier
  - ☐ Eating habits became neither healthier nor less healthy
  - ☐ Eating habits became somewhat less healthy
  - ☐ Eating habits became much less healthy
-

Display This Question:

*If Did the eating habits of anyone in your household change because of the COVID-19 pandemic? != Definitely not*

*And Did the eating habits of anyone in your household change because of the COVID-19 pandemic? != Probably not*

Why did eating habits change in your household? Check all that apply.

- ☐ Financial limitations
  - ☐ More time to cook
  - ☐ Less time to cook
  - ☐ Less access to restaurants
  - ☐ Increased stress/emotional eating
  - ☐ Other \_\_\_\_\_
-

How do you perceive your current health?

- ☐ Excellent
  - ☐ Very good
  - ☐ Good
  - ☐ Fair
  - ☐ Poor
-



Please answer the following questions.

|                                                                                                               | Never                 | Almost never          | Sometimes             | Fairly often          | Often                 |
|---------------------------------------------------------------------------------------------------------------|-----------------------|-----------------------|-----------------------|-----------------------|-----------------------|
| In the last month, how often have you been upset because of something that happened unexpectedly?             | <input type="radio"/> |
| In the last month, how often have you felt that you were unable to control the important things in your life? | <input type="radio"/> |
| In the last month, how often have you felt nervous and stressed?                                              | <input type="radio"/> |
| In the last month, how often have you felt confident about your ability to handle your personal problems?     | <input type="radio"/> |
| In the last month, how often have you felt that things were going your way?                                   | <input type="radio"/> |
| In the last month, how                                                                                        | <input type="radio"/> |



often have  
you found that  
you could not  
cope with all  
the things that  
you had to  
do?

In the last  
month, how  
often have  
you been able  
to control  
irritations in  
your life?

In the last  
month, how  
often have  
you felt that  
you were on  
top of things?

In the last  
month, how  
often have  
you been  
angered  
because of  
things that  
happened that  
were outside  
of your  
control?

In the last  
month, how  
often have  
you felt  
difficulties  
were piling up  
so high that  
you could not  
overcome  
them?

☐☐☐☐☐☐☐☐☐☐☐☐☐☐☐☐☐☐☐☐

Almost done. Now please tell us a little bit about your screen-time habits.

---

**Before the COVID-19 pandemic**, how many times in a typical week did all, or most, of the people living in your house eat a meal together **without** any screens on?

- ☐ Never
  - ☐ 1-2 times
  - ☐ 3-4 times
  - ☐ 5-6 times
  - ☐ 7 times
  - ☐ More than 7 times
- 

**During the COVID-19 pandemic**, how many times in a typical week do all, or most, of the people living in your house eat a meal together **without** any screens on?

- ☐ Never
  - ☐ 1-2 times
  - ☐ 3-4 times
  - ☐ 5-6 times
  - ☐ 7 times
  - ☐ More than 7 times
-

**Before the COVID-19 pandemic**, how many times in a typical week did all, or most, of the people living in your house eat a meal together **while watching television**?

- ☐ Never
  - ☐ 1-2 times
  - ☐ 3-4 times
  - ☐ 5-6 times
  - ☐ 7 times
  - ☐ More than 7 times
- 

**During the COVID-19 pandemic**, how many times in a typical week do all, or most, of the people living in your house eat a meal together **while watching television**?

- ☐ Never
- ☐ 1-2 times
- ☐ 3-4 times
- ☐ 5-6 times
- ☐ 7 times
- ☐ More than 7 times

Thank you for your participation. If you are interested in participating in health-related surveys, look for more HITS from our research group in the near future.
